# Supplementary material
Source: Research Square preprint supplement (doi:10.21203/rs.3.rs-8852374/v1)
Supplement: Supplementary file 1 [file 0a024505fb7bef4ac7838bf2.xlsx]

## Sheet: Table 1
Table 1 Patient characteristics
Variable	Category	Number of patients / mean±SD
Sex	Man	65
	Woman	188
Age (years)		74.5±11.0
Primary disease	Osteoporosis	123
	Malignant tumor	130
MRONJ site	Upper jaw	85
	Lower jaw	168
MRONJ stage	Stage 0	3
	Stage 1	13
	Stage 2	185
	Stage 3	52
Type of ARA	BP	92
	DMB	131
	BP→DMB	30
Osteolysis*	None	32
	Grade 1	141
	Grade 2	71
	Grade 3	9
Periosteal reaction	None	207
	Attached-type	15
	Gap-type	24
	Irregular-type	7
MRONJ type	Type-A	94
	Type-B	118
	Type-C	41
Treatment method	Non-surgical	29
	Surgical	224
Total		253
Abbreviation MRONJ: medication-related osteonecrosis of the jaw ARA: antiresorptive agent SD: standard deviation BP: bisphosphonate DMB: denosumab *Osteolysis Grade 1: not involving the mandibular canal (mandible) / not involving the floor of the maxillary or nasal sinus (maxilla) Grade 2: involving the mandibular canal (mandible) / involving the floor of the maxillary or nasak sinus (maxilla) Gr…
