# Supplementary material
Source: Research Square preprint supplement (doi:10.21203/rs.3.rs-8852374/v1)
Supplement: Supplementary file 2 [file 963273c9cb4a60c85bb53711.xlsx]

## Sheet: Table 3
Table 3 Factors related to surgical methods
Variable	Category	Operation method§			p value
		Sequestrectomy	Localized resection	Wide resection
Sex	Man	12	31	12	0.72
	Woman	30	103	32
Age		74.6±10.7	74.6±10.6	72.7±11.8	0.589
Primary disease	Osteoporosis	26	69	12	0.003
	Malignant tumor	16	65	32
MRONJ site	Upper jaw	14	63	1	<0.001
	Lower jaw	28	71	43
MRONJ stage	Stage 0	1	1	0	<0.001
	Stage 1	6	3	2
	Stage 2	34	108	20
	Stage 3	1	22	22
Type of ARA	BP	19	52	12	0.517
	DMB	18	67	26
	BP→DMB	5	15	6
Osteolysis*	None	3	14	8	<0.001
	Grade 1	32	84	10
	Grade 2	7	36	17
	Grade 3	0	0	9
Periosteal reaction	None	40	120	22	<0.001
	Attached-type	1	7	3
	Gap-type	1	4	16
	Irregular-type	0	3	3
MRONJ type	Type A	30	42	13	<0.001
	Type B	9	76	18
	Type C	3	16	13
Abbreviation MRONJ: medication-related osteonecrosis of the jaw ARA: antiresorptive agent BP: bisphosphonate DMB: denosumab *Osteolysis Grade 1: not involving the mandibular canal (mandible) / not involving the floor of the maxillary or nasal sinus (maxilla) Grade 2: involving the mandibular canal (mandible) / involving the floor of the maxillary or nasak sinus (maxilla) Grade 3: extending to the…
