# Supplementary material
Source: Research Square preprint supplement (doi:10.21203/rs.3.rs-8852374/v1)
Supplement: Supplementary file 3 [file a7221aeaf942ac26834c3f72.xlsx]

## Sheet: Table 2
Table 2 Factors related to MRONJ type
Variable	Category	MRONJ type			p value
		Type-A	Type-B	Type-C
Sex	Man	23	29	13	0.572
	Woman	71	89	28
Age (years)		77.7±10.6	73.8±10.3	69.1±11.5	<0.001
Primary disease	Osteoporosis	70	47	6	<0.001
	Malignant tumor	24	71	35
MRONJ site	Upper jaw	30	45	10	0.251
	Lower jaw	64	73	31
MRONJ stage	Stage 0	1	1	1	0.055
	Stage 1	4	3	6
	Stage 2	65	92	28
	Stage 3	24	22	6
Type of ARA	BP	49	39	4	<0.001
	DMB	35	65	31
	BP→DMB	10	14	6
Periosteal reaction	None	85	92	30	0.002
	Attached-type	8	6	1
	Gap-type	1	15	8
	Irregular-type	0	5	2
Total		94	118	41
Abbreviation MRONJ: medication-related osteonecrosis of the jaw ARA: antiresorptive agent BP: bisphosphonate DMB: denosumab
